# Supplementary material for: SIMPOL.1: a simple group contribution method for predicting vapor pressures and enthalpies of vaporization of multifunctional organic compounds
Source: Copernicus journal article supplement (doi:10.5194/acp-8-2773-2008), 2008-05-29
Supplement: Supplementary file 1 [file acp-8-2773-2008-supplement.doc]

Supplementary Material. Pankow and Asher (2008) “SIMPOL.1: A Simple Group Contribution Method for Predicting Vapor Pressures and Enthalpies of Vaporization of Multifunctional Organic Compounds” ACP-2007-0285, *Atmospheric Chemistry and Physics*.

Functional Form of Vapor Pressure Parameterizations and Data Sources

**1.** When utilized in this work, the form of the Antoine parameterization is that described by *[Reid et a*l., 1987]:

The values of the coefficients *A*, *B*, and *C* utilized were found, or derived in this work, using the sources given in Sections 1.11.22. In the case of coefficients derived in this work, these were determined from experi­mental vapor pressures by minimizing the good­ness-of-fit function

where *p*exp(*Tn*) is the experimentally measured vapor pressure at temperature *Tn*. The minimization was performed by the “Solver” feature in Microsoft Excel 2000 (9.0.6926 SP-3).

In cases when the primary data in­volved the sublimation vapor pressure (), con­ver­sion to sub-cooled liquid vapor pressure () values proceeded using Praus­nitz, [1969]:

where *T*mp (K) is the melting point, (J mol-1) is the molar heat of fusion at *T*mp, and *R* (J mol-1 K-1) is the gas constant.

**1.1.** Antoine coefficients for sub-cooled liquid-phase vapor pressures were derived from solid-phase vapor pressure data and values measured by Verevkin [1998].

**1.2.** Antoine coefficients for sub-cooled liquid-phase vapor pressures were derived from solid-phase vapor pressure data measured by Aihara [1960]. Values for for these compounds were estimated using the method of Jain *et al.* [2004].

**1.3.** Antoine coefficients for sub-cooled liquid-phase vapor pressures were derived from solid-phase vapor pressure data and values measured by Verevkin [1999].

**1.4.** Antoine coefficients for sub-cooled liquid-phase vapor pressures were derived from solid-phase vapor pressure data and values measured by Rai and Mandal [1990].

**1.5.** Antoine coefficients for sub-cooled liquid-phase vapor pressures were derived from solid-phase vapor pressure data measured by Davies *et al*. [1959]. Values for for these compounds were estimated using the method of Jain *et al.* [2004].

**1.6.** Antoine coefficients were obtained from Lemmon *et al.* [2000].

**1.7.** Antoine coefficients were derived by fitting reduced-pressure boiling point data obtained from the Beilstein Crossfire Online Database – BS0303PR

([http://www.beilstein.com](http://www.beilstein.com/)).

**1.8.** Antoine coefficients for sub-cooled liquid-phase vapor pressures were derived from solid-phase vapor pressure data and values for from Monte and Hillesheim [2001a].

**1.9.** Antoine coefficients were derived from liquid-phase vapor pressure data measured by Nelson and Wales [1925].

**1.10.** Antoine coefficients were derived from liquid-phase vapor pressure data measured by Hatton *et al*. [1962].

**1.11.** Antoine coefficients were derived from liquid-phase vapor pressure data measured by Katayama [1988].

**1.12.** Antoine coefficients for sub-cooled liquid-phase vapor pressures were derived from solid-phase vapor pressures measured by Roux *et al*. [1998]. for dimethyl-benzene-1,3-dicarboxylate was obtained from Steele *et al*. [1997]. for dimethyl-benzene-1,4-dicarboxylate was obtained from the Beilstein Crossfire Online Database – BS0303PR

([http://www.beilstein.com](http://www.beilstein.com/)).

**1.13.** Antoine coefficients were derived from vapor pressure data measured by Verevkin *et al*. [1998].

**1.14.** Antoine coefficients for sub-cooled liquid-phase vapor pressures were derived from solid-phase vapor pressure data and values for from Monte and Hillesheim [2001b].

**1.15.** Antoine coefficients were derived from solid-phase vapor pressure data measured by Colomina *et al*. [1985]. Values of for these compounds were estimated using the method of Jain *et al.* [2004].

**1.16.** Antoine coefficients were derived from solid-phase vapor pressure data and values measured by Lee *et al*. [1997]

**1.17.** Antoine coefficients were derived from solid-phase vapor pressure data from Oja and Suuberg [1999]. Values of for these compounds were obtained from Shafizadeh *et al*. [1970]

**1.18.** Antoine coefficients were derived from liquid-phase vapor pressure data from Vacek and Stanek [1959].

**1.19.** Antoine coefficients were derived from solid-phase vapor pressure data from Edwards [1950]. Values of for these compounds were obtained from Lemmon *et al.* [2000].

**1.20.** Antoine coefficients were derived from solid-phase vapor pressure data from Ribeiro da Silva *et al*. [1992]. Values of for these compounds were obtained from Lemmon *et al.* [2000].

**1.21.** Antoine coefficients were derived from solid-phase vapor pressure data and values measured by Monte and Hillesheim [2001c].

**1.22.** Antoine coefficients were derived from solid-phase vapor pressure data from Ribeiro da Silva *et al*. [1999a]. values for 2-nitrobenzoic acid, 3-nitrobenzoic acid, and 4-nitrobenzoic acid were obtained from Ribiero da Silva *et al*. [1999a]. values for the methoxy nitrobenzoic acids were estimated using the method of Jain *et al.* [2004].

**1.23** Antoine coefficients for sub-cooled liquid phase derived from sublimation vapor pressure data measured by Davies and Thomas [1960], Tao and McMurray [1989], Ribeiro da Silva et al. [1999b], Chattopadhyay and Ziemann [2005], Koponen et al. [2007], and Cappa et al. (2007) and sub-cooled liquid vapor pressures from Bilde et al. [2003]. for propanedioic acid is taken from Hansen and Beyer [2004], for butanedioic, pentanedioic, hexanedioic, heptanedioic, octanedioic, nonanedioic, decanedioic, undecanedioic, and dodecanedioic acid from Roux et al. [2005].

**1.24** Antoine coefficients for sub-cooled liquid phase derived from sublimation vapor pressure data provided by Prof. C.D. Cappa [personal communication, 2008]. estimated using the method of Jain *et al.* [2004].

**1.25** Antoine coefficients for sub-cooled liquid phase derived from sublimation vapor pressure data provided by Prof. C.D. Cappa [personal communication, 2008] and Ribeiro da Silva et al. [2001]. estimated using the method of Jain *et al.* [2004].

**1.26** Antoine coefficients for sub-cooled liquid phase derived from sublimation vapor pressure data provided by Ribeiro da Silva et al. [2001]. estimated using the method of Jain *et al.* [2004].

**1.27** Antoine coefficients for sub-cooled liquid phase derived from sublimation vapor pressure data provided by Bilde and Pandis [2001]. estimated using the method of Jain *et al.* [2004].

**1.28** Antoine coefficients for sub-cooled liquid phase derived from sublimation vapor pressure data provided by Chattopadhyay and Ziemann [2005]. estimated using the method of Jain *et al.* [2004].

**2.** When utilized in this work, the coefficients are for the form of the Antoine parameterization described by Rohac *et al*. [1999]:

for in kPa and T in Kelvin.

**3.** When utilized in this work, the form of the modified Clausius-Clapeyron equation is

(e.g., see Schwarzenba*ch et a*l., 1993) where *R* (J mol-1 K-1) is the gas constant, *B* = (J mol-1) is the molar heat of vaporization, and *A* = *T*bp (K) is the boiling point at 1 atm of pressure.

**3.1.** Values of *A* = *T*bp were taken from Brown and Stein [2000]. Values of *B* =  were taken from Lemmon *et al.* [2000].

**3.2.** Values of *A* = *T*bp were taken from Brown and Stein [2000]. Values of *B* =  were derived by fitting reduced-pressure boiling point data taken from Beilstein Crossfire Online Database – BS0303PR ([http://www.beilstein.com](http://www.beilstein.com/)) to Eq.().

**3.3.** Values of *A* = *T*bp taken from Beilstein Crossfire Online Database – BS0303PR ([http://www.beilstein.com](http://www.beilstein.com/)). Values of *B* =  were taken from Lemmon *et al.* [2000].

**4.** Clausius-Clapeyron parameterization in the form:

**4.1.** Coefficients *A* and *B* provided by Schwarzenbach *et al*. [1988] for sub-cooled liquid vapor pressures with in units of atm.

**4.2.** Coefficients *A* and *B* provided by Egerton *et al*. [1951] with in units of Torr.

**4.3.** Coefficients *A* and *B* provided by Bruck­mann and Willner [1983] with in units of Torr.

| **Table 1.** Saturated and Aromatic Oxygenated Compounds in the SIMPOL.1 Basis and Test Sets Not Found in *Asher et al*. [2002] or *Asher and Pankow* *[Asher and Pank*ow, 2006] and their Vapor Pressure Parameterizations. | | | | | | | | |
| --- | --- | --- | --- | --- | --- | --- | --- | --- |
| **Compound** | **Formula** | ***T*MIN (K)** | ***T*MAX (K)** | **Method/**  **Source** | **Units for** | ***A*** | ***B*** | ***C*** |
| 2-ethyl-hexanoic acid | C8H16O2 | 154.75 | 500.7 | 3.1 | atm | 500.7 | 75.6 | NAa |
| 4-hydroxybiphenyl | C12H10O | 273.15 | 393.15 | 1.1 | atm | 4.70776383 | 3000.2367 | -19.2077 |
| 2-hydroxybiphenyl | C12H10O | 273.15 | 393.15 | 1.1 | atm | 5.54610878 | 3000.4302 | -23.46 |
| 4-(phenylmethyl)-phenol | C13H12O | 273.15 | 393.15 | 1.2 | atm | 5.07006745 | 3001.3786 | -44.1157 |
| 2-methyl-4-(t-butyl)-phenol | C11H16O | 273.15 | 393.15 | 1.2 | atm | 5.19868532 | 2999.7694 | -9.04344 |
| 2,4,6-tri-(t-butyl)-phenol | C18H30O | 273.15 | 393.15 | 1.2 | atm | 5.49062056 | 3000.1363 | -17.0523 |
| 4-hydroxy-benzaldehyde | C7H6O2 | 273.15 | 393.15 | 1.2 | atm | 5.02355003 | 3000.8096 | -31.7091 |
| 1-(4-hydroxyphenyl)-ethanone | C8H8O2 | 273.15 | 393.15 | 1.2 | atm | 4.96236776 | 3001.2275 | -40.8163 |
| 4-(t-butyl)-phenol | C10H14O | 273.15 | 393.15 | 1.3 | atm | 6.09100407 | 3000.2064 | -18.6034 |
| 2-(t-butyl)-4-methylphenol | C11H16O | 273.15 | 393.15 | 1.3 | atm | 5.82327537 | 2999.6694 | -6.89021 |
| 5-methyl-2-(t-butyl)-phenol | C11H16O | 273.15 | 393.15 | 1.3 | atm | 6.04871460 | 3000.0040 | -14.1917 |
| 1-napthol | C10H8O | 273.15 | 393.15 | 1.4 | atm | 5.47148128 | 3000.2975 | -20.5635 |
| 2-napthol | C10H8O | 273.15 | 393.15 | 1.4 | atm | 5.46967874 | 3000.6935 | -29.2126 |
| 4-ethyl benzoic acid | C9H10O2 | 273.15 | 393.15 | 1.25 | atm | 7.315550084 | 3973.0373 | -0.421310 |
| 4-propyl-benzoic acid | C10H12O2 | 273.15 | 393.15 | 1.25 | atm | 7.500559464 | 4114.7733 | -0.493004 |
| 4-butyl-benzoic acid | C11H14O2 | 273.15 | 393.15 | 1.25 | atm | 7.314088878 | 4208.0865 | -0.30745 |
| 4-pentyl-benzoic acid | C12H16O2 | 273.15 | 393.15 | 1.25 | atm | 7.630760454 | 4480.8510 | -0.34602 |
| 4-hexyl-benzoic acid | C13H18O2 | 273.15 | 393.15 | 1.25 | atm | 16.72944709 | 7588.8791 | -0.50701 |
| propanedioic acid | C3H4O4 | 273.15 | 393.15 | 1.23 | atm | 9.444076784 | 5000.3301 | 0.192797 |
| butanedioic acid | C4H6O4 | 273.15 | 393.15 | 1.23 | atm | 7.533114587 | 4527.6472 | -9.136332 |
| pentanedioic acid | C5H8O4 | 273.15 | 393.15 | 1.23 | atm | 11.73355553 | 5904.6491 | 0.687861 |
| hexanedioic acid | C6H10O4 | 273.15 | 393.15 | 1.23 | atm | 9.618958622 | 5316.6864 | -9.808281 |
| heptanedioic acid | C7H12O4 | 273.15 | 393.15 | 1.23 | atm | 8.478132988 | 5115.6289 | 0.533759 |
| octanedioic acid | C8H14O4 | 273.15 | 393.15 | 1.23 | atm | 8.947826981 | 5402.8809 | 0.563080 |
| nonanedioic acid | C9H16O4 | 273.15 | 393.15 | 1.23 | atm | 7.729636056 | 5173.5101 | 8.864128 |
| decanedioic acid | C10H18O4 | 273.15 | 393.15 | 1.23 | atm | 7.383558993 | 4770.9826 | -12.3778 |
| dodecanedioic acid | C12H22O4 | 273.15 | 393.15 | 1.23 | atm | 5.626216757 | 4332.6180 | -0.250127 |
| 3-methyl-hexanedioic acid | C7H12O4 | 273.15 | 393.15 | 1.24 | atm | 9.688191628 | 5799.8683 | -6.570249 |
| 2,2-dimethyl-butanoic acid | C6H10O4 | 273.15 | 393.15 | 1.25 | atm | 13.66695202 | 6631.9761 | -0.469956 |
| 2-methyl-butanedioic acid | C5H8O4 | 273.15 | 393.15 | 1.26 | atm | 9.119138587 | 4863.9746 | -0.515560 |
| 2-methyl-pentanedioic acid | C6H10O4 | 273.15 | 393.15 | 1.26 | atm | 9.85983716 | 5109.6502 | -0.948069 |
| 2,2-dimethyl-pentanedioic acid | C7H12O4 | 273.15 | 393.15 | 1.26 | atm | 9.697570108 | 5108.3036 | -0.470617 |
| pinic acid | C9H14O4 | 273.15 | 393.15 | 1.27 | atm | 6.519500127 | 4585.5913 | -0.37386 |
| norpinic acid | C8H12O4 | 273.15 | 393.15 | 1.27 | atm | -3.98399294 | 1167.2830 | -0.20076 |
| 2-oxopentanedioic acid | C5H6O5 | 273.15 | 393.15 | 1.28 | atm | 6.52784412 | 3961.9590 | -0.79579 |
| 3-oxopentanedioic acid | C5H6O5 | 273.15 | 393.15 | 1.28 | atm | 14.8913223 | 7157.3561 | -0.79953 |
| 2-oxohexanedioic acid | C6H8O5 | 273.15 | 393.15 | 1.28 | atm | 9.40230255 | 5183.2423 | -0.88258 |
| 3-oxohexanedioic acid | C6H8O5 | 273.15 | 393.15 | 1.28 | atm | 12.0022605 | 6560.4963 | -1.23690 |
| 5-oxononanedioic acid | C9H14O5 | 273.15 | 393.15 | 1.28 | atm | 5.25311988 | 4452.2311 | -0.85050 |
| 15-hydroxypentadecanoic acid | C15H30O3 | 273.15 | 393.15 | 1.28 | atm | 0.58205751 | 2763.8938 | -0.30403 |
| 16-hydroxyhexadecanoic acid | C16H32O3 | 273.15 | 393.15 | 1.28 | atm | 1.444024305 | 3113.9762 | -0.35441 |
| 12-hydroxyoctadecanoic acid | C18H36O3 | 273.15 | 393.15 | 1.28 | atm | -0.579115642 | 2650.6926 | -0.32962 |
| aNA = Not Applicable |  |  |  |  |  |  |  |  |

| **Table 2.**  Amides in the SIMPOL.1 Basis and Test Sets and their Vapor Pressure Parameterizations. | | | | | | | | |
| --- | --- | --- | --- | --- | --- | --- | --- | --- |
| **Compound** | **Formula** | ***T*MIN (K)** | ***T*MAX (K)** | **Method/Source** | **Units for** | ***A*** | ***B*** | ***C*** |
| octanamide | C8H17NO | 325 | 374 | 1.5 | atm | 2.98625039 | 1791.9555 | -100.1569 |
| heptanamide | C7H15NO | 345 | 366 | 1.5 | atm | 2.96863086 | 1796.5450 | -88.72823 |
| hexanamide | C6H13NO | 338 | 368 | 1.5 | atm | 3.24706267 | 1789.6416 | -86.06252 |
| pentanamide | C5H11NO | 333 | 374 | 1.5 | atm | 3.50524533 | 1788.1264 | -80.58214 |
| butyramide | C4H9NO | 298 | 341 | 1.5 | atm | 3.79284235 | 1786.0878 | -80.55015 |
| formamide | CH3NO | 343 | 634 | 1.6 | atm | 7.5852 | 3881.305 | 27.655 |
| propanamide | C3H7NO | 318 | 346 | 1.5 | atm | 3.80708626 | 1785.642 | -75.03003 |
| acetamide | C2H5NO | 298 | 349 | 1.5 | atm | 4.54802005 | 2003.6692 | -69.76276 |
| butyl-acetamide | C6H13NO | 261 | 502 | 3.1 | atm | 502 | 76 | NAa |
| *n*-methyl-butyramide | C5H11NO | 352 | 429 | 1.7 | atm | 6.93228177 | 2711.3609 | -77.11400 |
| ethyl-formamide | C3H7NO | 243 | 471 | 3.1 | atm | 471.2 | 58.44 | NA |
| methyl-acetamide | C3H7NO | 303 | 363 | 1.6 | atm | -0.06922 | 144.114 | -277.873 |
| methyl-formamide | C2H5NO | 268 | 456 | 3.1 | atm | 455.7 | 56.19 | NA |
| *n,n*-dimethyl-cyclohexane-carboxamide | C9H17NO | 312 | 393 | 1.7 | atm | 7.08562742 | 3403.4356 | -10.87568 |
| *n,n*-diethyl-butanamide | C8H17NO | 308 | 479 | 1.7 | atm | 4.25473575 | 1732.7303 | -75.49241 |
| dimethyl-propanamide | C5H11NO | 228 | 448 | 3.1 | atm | 447.7 | 52.89 | NA |
| diethyl-formamide | C5H11NO | 303 | 363 | 1.6 | atm | 5.06358 | 2046.3630 | -35.77400 |
| dimethyl-acetamide | C4H9NO | 303 | 363 | 1.6 | atm | 6.09451 | 2725.9600 | 28.20900 |
| dimethyl-formamide | C3H7NO | 303 | 363 | 1.6 | atm | 3.93068 | 1337.7160 | -82.65000 |
| 1-methyl-piperidin-2-one | C6H11NO | 336 | 496 | 1.7 | atm | 4.11508797 | 1781.2912 | -71.93089 |
| aNA = Not Applicable |  |  |  |  |  |  |  |  |

| **Table 3.** Amines in the SIMPOL.1 Basis and Test Sets and their Vapor Pressure Parameterizations. | | | | | | | | |
| --- | --- | --- | --- | --- | --- | --- | --- | --- |
| **Compound** | **Formula** | ***T*MIN (K)** | ***T*MAX (K)** | **Method/Source** | **Units for** | ***A*** | ***B*** | ***C*** |
| hexylamine | C6H15N | 258 | 403 | 3.1 | atm | 403 | 45.13 | NAa |
| 1,2-ethane-diamine | C2H8N2 | 300 | 391 | 1.6 | atm | 4.22368 | 1302.256 | -81.788 |
| 1-pentylamine | C5H13N | 218 | 375 | 3.1 | atm | 375 | 40.15 | NA |
| 1-butylamine | C4H11N | 224 | 351 | 3.1 | atm | 351 | 35.84 | NA |
| isobutylamine | C4H11N | 223 | 342 | 1.6 | atm | 4.41304 | 1317.873 | -42.421 |
| 2-butylamine | C4H11N | 169 | 336 | 3.1 | atm | 336 | 32.64 | NA |
| 1-propylamine | C3H9N | 296 | 351 | 1.6 | atm | 4.05136 | 1044.028 | -62.314 |
| *tert*-butylamine | C4H11N | 292 | 348 | 1.6 | atm | 3.90694 | 992.719 | -62.727 |
| 2-propylamine | C3H9N | 277 | 334 | 1.6 | atm | 4.01507 | 985.65 | -59.079 |
| ethylamine | C2H7N | 191 | 290 | 1.6 | atm | 4.45586 | 1121.445 | -37.854 |
| methylamine | CH5N | 190 | 267 | 1.6 | atm | 4.5199 | 1034.977 | -37.574 |
| dibutylamine | C8H19N | 211 | 430 | 3.1 | atm | 430 | 49.47 | NA |
| *n*-propyl-1-propanamine | C6H15N | 210 | 383 | 3.1 | atm | 383 | 40.1 | NA |
| dimethyl-hydroxylamine | C2H7NO | 291 | 363 | 1.6 | atm | 4.67111 | 1405.452 | -72.215 |
| *n*-methyl-1-butanamine | C5H13N | 198 | 364 | 3.1 | atm | 364.2 | 32.9 | NA |
| *n*-(1-methylethyl)-2-propanamine | C6H15N | 177 | 357 | 3.1 | atm | 357 | 34.72 | NA |
| diethylamine | C4H11N | 304 | 334 | 1.6 | atm | 2.86193 | 559.071 | -132.974 |
| isopropyl-methylamine | C4H11N | n.a. | 325 | 3.1 | atm | 324.7 | 30.93 | NA |
| dimethylamine | C2H7N | 201 | 280 | 1.6 | atm | 4.29371 | 995.445 | -47.869 |
| triethylamine | C6H15N | 323 | 367 | 1.6 | atm | 2.98368 | 695.814 | -128.271 |
| trimethylamine | C3H9N | 193 | 277 | 1.6 | atm | 4.01613 | 970.297 | -34.06 |
| 4-amino-3-methylbenzoic | C8H9NO2 | 367 | 383 | 1.8 | atm | 7.46559491 | 4382.9157 | -22.73268 |
| 3-amino-4-methylbenzoic | C8H9NO2 | 363 | 377 | 1.8 | atm | 7.40280084 | 4382.5272 | -11.12597 |
| 3-amino-2-methylbenzoic | C8H9NO2 | 367 | 381 | 1.8 | atm | 4.20102715 | 2615.3446 | -73.49192 |
| 2-amino-6-methylbenzoic | C8H9NO2 | 339 | 355 | 1.8 | atm | 4.62093277 | 2614.7784 | -73.65167 |
| 2-amino-5-methylbenzoic | C8H9NO2 | 345 | 361 | 1.8 | atm | 4.56178158 | 2614.4038 | -65.50829 |
| 2-amino-3-methylbenzoic | C8H9NO2 | 343 | 343 | 1.8 | atm | 4.55909601 | 2614.2022 | -61.23092 |
| o-amino-toluene | C7H9N | 252 | 473 | 3.1 | atm | 473 | 57.9 | NA |
| 1-amino-2,4-dimethylbenzene | C8H11N | 325 | 485 | 1.6 | atm | 5.18072 | 2293.277 | -41.261 |
| 1-amino-4-ethylbenzene | C8H11N | 325 | 491 | 1.6 | atm | 5.07568 | 2318.392 | -33.508 |
| 1-amino-2,6-dimethylbenzene | C8H11N | 317 | 491 | 1.6 | atm | 4.70051 | 2157.756 | -32.151 |
| *m*-amino-toluene | C7H9N | 241 | 476 | 3.1 | atm | 476 | 45.6 | NA |
| *p*-amino-toluene | C7H9N | 315 | 473 | 3.1 | atm | 4.71884 | 1961.716 | -57 |
| *n*-ethyl-*n*-phenylamine | C8H11N | 323 | 480 | 1.6 | atm | 5.64275 | 2809.017 | 20.856 |
| *n*-methyl-phenylamine | C7H9N | 323 | 473 | 1.9 | atm | 4.99409 | 2226.576 | -22.456 |
| *n,n*-dimethyl-n-phenyl-amine | C8H11N | 302 | 466 | 1.6 | atm | 4.83003 | 2117.236 | -27.606 |
| phenylamine | C6H7N | 304 | 457 | 1.10 | atm | 4.34541 | 1661.858 | -74.048 |
| methyl-*n*-phenyl-amine | C7H9N | 302 | 458 | 1.6 | atm | 4.8271 | 2003.528 | -41.973 |
| 1-(diethylamino)-2-propanone | C7H15NO | 311 | 432 | 1.7 | atm | 4.75094205 | 1893.0129 | -33.68959 |
| 1-(dimethylamino)-2-propanone | C5H11NO | 300 | 399 | 1.7 | atm | 1.74075706 | 325.94917 | -208.9975 |
| triethanolamine | C6H15NO3 | 290 | 390 | 1.7 | atm | 7.93043866 | 4389.6929 | -30.89348 |
| aNA = Not Applicable |  |  |  |  |  |  |  |  |

| **Table 4.**  Esters in the SIMPOL.1 Basis and Test Sets and their Vapor Pressure Parameterizations. | | | | | | | | |
| --- | --- | --- | --- | --- | --- | --- | --- | --- |
| **Compound** | **Formula** | ***T*MIN (K)** | ***T*MAX (K)** | **Method/Source** | **Units for** | ***A*** | ***B*** | ***C*** |
| *n*-butyl-benzoate | C11H14O2 | 374 | 474 | 1.11 | atm | 5.574224 | 2552.706 | -49.4701 |
| 2-methyl-propyl-benzoate | C11H14O2 | 370 | 467 | 1.11 | atm | 5.24134 | 2550.831 | -22.973 |
| ethyl-2-butoxy-ethanoate | C8H16O3 | 210 | 465 | 3.1 | atm | 465.2 | 59.54 | NAa |
| *n*-propyl-benzoate | C10H12O2 | 359 | 458 | 1.11 | atm | 4.71837 | 2185.719 | -39.467 |
| phenyl-methyl-ethanoate | C9H10O2 | 319 | 429 | 1.6 | atm | 2.34301 | 791.918 | -175.864 |
| ethyl-benzoate | C8H8O2 | 239 | 485 | 3.1 | atm | 485 | 45.19 | NA |
| methyl-benzoate | C8H8O2 | 333 | 438 | 1.11 | atm | 3.701407 | 1354.186 | -108.104 |
| acetic-acid,-phenyl-ester | C8H8O2 | 311 | 469 | 1.6 | atm | 5.02585 | 2174.699 | -36.045 |
| methyl-heptanoate | C8H16O2 | 323 | 447 | 1.7 | atm | 4.178764 | 1449.989 | -98.7947 |
| hexyl-ethanoate | C8H16O2 | 330 | 445 | 1.7 | atm | 4.086754 | 1449.005 | -88.9979 |
| ethyl-hexanoate | C8H16O2 | 298 | 441 | 1.7 | atm | 4.058232 | 1448.492 | -83.9931 |
| 1-methyl-propyl-butanoate | C8H16O2 | 273 | 424 | 3.1 | atm | 424.65 | 47 | NA |
| propyl-pentanoate | C8H16O2 | 202 | 441 | 3.1 | atm | 440.7 | 40 | NA |
| ethyl-4-methyl-pentanoate | C8H16O2 | 284 | 433 | 1.6 | atm | 4.69631 | 1847.593 | -40.092 |
| 1-methyl-ethyl-pentanoate | C8H16O2 | 324 | 438 | 3.2 | atm | 438.05 | 38.5 | NA |
| propyl-3-methyl-butanoate | C8H16O2 | 281 | 429 | 1.6 | atm | 4.7678 | 1873.942 | -35.977 |
| 2-methyl-propyl-butanoate | C8H16O2 | 277 | 430 | 1.6 | atm | 4.75676 | 1927.291 | -25.089 |
| 2-methyl-propyl-2-methyl-propanoate | C8H16O2 | 277 | 421 | 1.6 | atm | 4.76033 | 1806.356 | -40.698 |
| methyl-pentanoate | C6H12O2 | 273 | 410 | 3.1 | atm | 410 | 43.1 | NA |
| ethyl-butanoate | C6H12O2 | 255 | 394 | 1.6 | atm | 4.33187 | 1509.443 | -45.284 |
| methyl-3-methyl-butanoate | C6H12O2 | 254 | 390 | 1.6 | atm | 4.52819 | 1582.466 | -40.123 |
| 2-methyl-propyl-ethanoate | C6H12O2 | 252 | 391 | 1.6 | atm | 4.53676 | 1625.875 | -32.494 |
| ethyl-2-methyl-propanoate | C6H12O2 | 249 | 383 | 1.6 | atm | 4.48202 | 1536.985 | -39.904 |
| dimethyl-1,2-benzenedicarboxylate | C10H10O4 | 324 | 552 | 2 | kPa | 14.82359 | 4660.937 | -99.10860 |
| dimethyl-benzene-1,3-dicarboxylate | C10H10O4 | 294 | 309 | 1.12 | atm | 3.370812 | 1795.995 | -93.4013 |
| dimethyl-benzene-1,4-dicarboxylate | C10H10O4 | 311 | 330 | 1.12 | atm | 6.465142 | 3374.277 | -13.1114 |
| dimethyl-cyclohexane-1,3-dicarboxylate | C10H16O4 | 357 | 551 | 1.7 | atm | 4.01033 | 1813.998 | -94.748 |
| diethyl-hexanedicarboxylate | C10H18O4 | 350 | 524 | 1.6 | atm | 5.26245 | 2572.141 | -34.746 |
| *di-*n-butyl-ethanedicarboxylate | C10H18O4 | 356 | 513 | 3.2 | atm | 513 | 52 | NA |
| diethyl-cyclopentane-1,1-dicarboxylate | C11H18O4 | 293 | 323 | 1.13 | atm | 0.365182 | 531.396 | -187.068 |
| diethyl-cyclopropane-1,1-dicarboxylate | C9H14O4 | 288 | 318 | 1.13 | atm | 0.602863 | 530.6848 | -181.491 |
| diethyl-ethanedicarboxylate | C6H10O4 | 320 | 459 | 1.6 | atm | 5.98158 | 2537.141 | -34.06 |
| 1,2-ethanediol-diacetate | C6H10O4 | 336 | 466 | 1.7 | atm | 6.36566 | 2933.612 | 0.0328626 |
| dimethyl-propanedicarboxylate | C5H8O4 | 308 | 454 | 1.6 | atm | 5.22732 | 2143.666 | -43.448 |
| diethyl-cyclobutane-1,1-dicarboxylate | C10H16O4 | 288 | 318 | 1.13 | atm | 0.471713 | 530.8136 | -183.234 |
| ethyl-cyclopentanecarboxylate | C9H14O4 | 274 | 308 | 1.13 | atm | 0.862263 | 470.0863 | -168.379 |
| ethyl-cyclobutanecarboxylate | C8H12O4 | 273 | 308 | 1.13 | atm | 0.975704 | 448.3845 | -162.792 |
| methyl-cyclobutanecarboxylate | C7H10O4 | 268 | 323 | 1.13 | atm | 0.626052 | 282.3435 | -188.782 |
| ethyl-cyclopropanecarboxylate | C7H10O4 | 278 | 308 | 1.13 | atm | 1.622442 | 510.881 | -154.414 |
| methyl-cyclopropanecarboxylate | C6H8O4 | 273 | 313 | 1.13 | atm | 1.60185 | 434.8424 | -162.377 |
| ethyl-2-propoxyethanoate | C7H14O3 | 273 | 452 | 3.1 | atm | 452 | 55.62 | NA |
| methyl-dimethoxyethanoate | C5H10O4 | 325 | 344 | 1.7 | atm | 1.957257 | 479.2967 | -206.293 |
| aNA = Not Applicable |  |  |  |  |  |  |  |  |

| **Table 5.** Ethers in the SIMPOL.1 Basis and Test Sets and their Vapor Pressure Parameterizations. | | | | | | | | |
| --- | --- | --- | --- | --- | --- | --- | --- | --- |
| **Compound** | **Formula** | ***T*MIN (K)** | ***T*MAX (K)** | **Method/Source** | **Units for** | ***A*** | ***B*** | ***C*** |
| diethyl ether | C4H10O | 250 | 329 | 1.6 | atm | 4.022 | 1062.64 | -44.93 |
| 1-butoxy-2-ethoxyethane | C8H18O2 | 273 | 435 | 3.1 | atm | 435 | 50.94 | NAa |
| 1,2-dipropoxyethane | C8H18O2 | 273 | 435 | 3.1 | atm | 435 | 50.62 | NA |
| 1-(2-methoxyethoxy)-butane | C7H16O2 | 273 | 420 | 3.1 | atm | 420 | 47.83 | NA |
| 1,3-diethoxypropane | C7H16O2 | 273 | 414 | 3.1 | atm | 413.7 | 45.92 | NA |
| 1,2-epoxy-3-isopropoxy-propane | C6H12O2 | 273 | 405 | 3.1 | atm | 404.7 | 43.5 | NA |
| 1,1-dimethoxybutane | C6H14O2 | 273 | 387 | 3.1 | atm | 387 | 41.7 | NA |
| dimethoxy-methane | C3H8O2 | 273 | 308 | 1.6 | atm | 4.029975 | 1068.35 | -50.409 |
| 2-*n*-butoxy-1-ethanol | C6H14O2 | 299 | 443 | 1.6 | atm | 4.25626 | 1511.414 | -88.815 |
| 2-(2-methylpropoxy)-ethanol | C6H14O2 | 344 | 432 | 1.6 | atm | 4.73287 | 1766.888 | -59.128 |
| 2-(2-methoxyethoxy)-tetrahydro-2H-pyran | C8H16O3 | 273 | 471 | 3.1 | atm | 471.3 | 60 | NA |
| 2-methoxy-tetrahydro-pyran | C6H12O2 | 273 | 401 | 3.1 | atm | 401.7 | 42.7 | NA |
| 2-phenyl-1,3-dioxolane | C9H10O2 | 273 | 413 | 3.1 | atm | 413 | 62.13 | NA |
| 1,3-dioxacyclooctane | C6H12O2 | 273 | 407 | 3.1 | atm | 407 | 44.8 | NA |
| 5,5-dimethyl-1,3-dioxane | C6H12O2 | 273 | 398 | 3.1 | atm | 398 | 41 | NA |
| 4,4-dimethyl-1,3-dioxane | C6H12O2 | 299 | 406 | 1.6 | atm | 4.69235 | 1805.43 | -21.161 |
| 1,3-dioxepan | C5H10O2 | 195 | 392 | 3.1 | atm | 392 | 41.293 | NA |
| *cis*-2,4-dimethyl-1,3-dioxane | C6H12O2 | 273 | 391 | 3.1 | atm | 390.65 | 40 | NA |
| *trans*-2,2,4,6-tetramethyl-1,3-dioxane | C8H16O2 | 273 | 385 | 3.1 | atm | 384.65 | 41.9 | NA |
| 4-methyl-1,3-dioxane | C5H10O2 | 273 | 387 | 3.1 | atm | 387.2 | 39 | NA |
| 1,3-dioxane | C4H8O2 | 230 | 378 | 3.1 | atm | 378.7 | 39.09 | NA |
| 1,4-dioxane | C4H8O2 | 293 | 374 | 1.6 | atm | 4.58135 | 1570.093 | -31.297 |
| 1,3-dioxolan | C3H6O2 | 280 | 355 | 1.6 | atm | 4.11859 | 1237.377 | -48.735 |
| 1,1-dimethoxy-2-butene | C6H12O2 | 273 | 399 | 3.3 | atm | 399 | 43.26 | NA |
| 1,1-dimethoxy-ethene | C4H8O2 | 273 | 362 | 3.3 | atm | 362 | 35.4 | NA |
| 3-(3,4-dimethoxyphenyl)-propanoic acid | C11H14O4 | 352 | 366 | 1.14 | atm | 7.756857 | 4306.957 | -38.27643 |
| 3,4-dimethoxybenzoicacid | C9H10O4 | 355 | 379 | 1.15 | atm | 2.097138 | 1788.771 | -128.2405 |
| 3,5-dimethoxybenzoicacid | C9H10O4 | 359 | 378 | 1.15 | atm | 6.221483 | 3502.410 | -60.2279 |
| 2,6-dimethoxybenzoicacid | C9H10O4 | 355 | 378 | 1.15 | atm | 5.065479 | 3089.971 | -67.7979 |
| 3-(4-methoxyphenyl)-propanoic acid | C10H12O3 | 341 | 357 | 1.14 | atm | 7.941833 | 4306.262 | -17.41505 |
| 3-(2-methoxyphenyl)-propanoic acid | C10H12O3 | 331 | 347 | 1.14 | atm | 4.844668 | 2614.925 | -78.08624 |
| 4-methoxy-benzaldehyde | C8H8O2 | 283 | 522 | 1.7 | atm | 5.395640 | 2712.836 | -19.35678 |
| 4-methoxy-phenol | C7H8O2 |  |  | 1.16 | atm | 7.871883 | 3998.240 | 13.38746 |
| (phenoxymethyl)-oxirane | C9H10O2 | 276 | 518 | 3.1 | atm | 518.2 | 69.85 | NA |
| 2,4-dimethoxybenzoic-acid | C9H10O4 | 346 | 367 | 1.15 | atm | 2.168045 | 1798.434 | -126.5433 |
| 2,3-dimethoxybenzoic-acid | C9H10O4 | 336 | 356 | 1.15 | atm | 2.771580 | 1789.141 | -121.5258 |
| levoglucosan | C6H10O5 | 344 | 386 | 1.17 | atm | 11.21204 | 6218.366 | 0.277922 |
| aNA = Not Applicable |  |  |  |  |  |  |  |  |

| **Table 6.** Nitrates in the SIMPOL.1 Basis and Test Sets and their Vapor Pressure Parameterizations. | | | | | | | | |
| --- | --- | --- | --- | --- | --- | --- | --- | --- |
| **Compound** | **Formula** | ***T*MIN (K)** | ***T*MAX (K)** | **Method/Source** | **Units for** | ***A*** | ***B*** | ***C*** |
| phenylmethyl-nitrate | C7H7NO3 | 315 | 393 | 1.7 | atm | 6.06887 | 2756.749 | -23.1218 |
| 3-methylbutyl-nitrate | C5H11NO3 | 278 | 421 | 1.6 | atm | 4.74613 | 1785.807 | -43.975 |
| butyl-nitrate | C4H9NO3 | 273 | 343 | 1.6 | atm | 5.46933 | 2177.065 | -4.855 |
| 2-methylpropyl-nitrate | C4H9NO3 | 273 | 343 | 1.6 | atm | 5.32531 | 2045.425 | -8.996 |
| propylnitrate | C3H7NO3 | 273 | 343 | 1.6 | atm | 4.86209 | 1721.723 | -27.66 |
| 1-methylethyl-nitrate | C3H7NO3 | 273 | 343 | 1.6 | atm | 3.54496 | 1018.568 | -89.622 |
| ethyl-nitrate | C2H5NO3 | 273 | 333 | 1.6 | atm | 4.28523 | 1337.035 | -48.37 |
| cyclohexane-nitrate | C6H11NO3 | 310 | 454 | 1.7 | atm | 6.04373 | 2754.808 | 6.99462 |
| cyclopental-nitrate | C5H9NO3 | 325 | 434 | 1.7 | atm | 6.46142 | 2755.340 | -2.42039 |
| 2-nitro-2-[(nitrooxy)methyl]-1,3-propanediol-dinitrate | C4H6N4O11 | 313 | 353 | 1.18 | atm | 2.91814 | 3003.350 | -34.1217 |
| 1,2,3-propanetrinitrate | C3H5N3O9 | 293 | 453 | 1.7 | atm | 5.95578 | 2759.095 | -71.7407 |
| 2,2’-oxybis-ethanol-dinitrate | C4H8N2O7 | 288 | 333 | 1.18 | atm | 10.6353 | 4356.373 | -19.4235 |

| **Table 7.** Nitro-Containing Compounds in the SIMPOL.1 Basis and Test Sets and their Vapor Pressure Parameterizations. | | | | | | | | |
| --- | --- | --- | --- | --- | --- | --- | --- | --- |
| **Compound** | **Formula** | ***T*MIN (K)** | ***T*MAX (K)** | **Method/Source** | **Units for** | ***A*** | ***B*** | ***C*** |
| 2,4,6-trinitrotoluene | C7H5N3O6 | 323 | 423 | 1.19 | atm | 4.56962 | 2614.284 | -83.151 |
| 1-nitrobutane | C4H9NO2 | 191 | 426 | 3.1 | atm | 426.2 | 48.58 | NAa |
| 2-nitrobutane | C4H9NO2 | 309 | 413 | 1.7 | atm | 4.69216 | 1838.834 | -20.909 |
| 3-nitro-1-propanol | C3H7NO3 | 345 | 412 | 1.7 | atm | 8.80410 | 4160.880 | -0.131540 |
| 3-nitro-2-pentanol | C5H11O3 | 333 | 403 | 1.7 | atm | 5.51023 | 1848.341 | -122.252 |
| 3-nitro-2-butanol | C4H9NO3 | 323 | 386 | 1.7 | atm | 5.69227 | 1848.229 | -120.281 |
| nitro-ethanol | C2H5NO3 | 288 | 471 | 1.7 | atm | 25.58636 | 34204.889 | 869.171 |
| 2-nitro-1-propanol | C3H7NO3 | 330 | 394 | 1.7 | atm | 7.306781 | 3511.292 | 9.79585 |
| methyl-4-nitrobutanoate | C5H9NO4 | 341 | 384 | 1.7 | atm | 12.2996 | 5419.999 | -0.218889 |
| ethyl-nitroacetate | C4H7NO4 | 315 | 398 | 1.7 | atm | 0.41394 | 287.696 | -240.865 |
| ethyl-2-nitropropionate | C5H9NO4 | 311 | 465 | 1.7 | atm | 3.56211 | 1154.632 | -147.464 |
| methyl-2-nitro-propionate | C4H7NO4 | 326 | 376 | 1.7 | atm | 3.108 | 1024.515 | -153.901 |
| methyl-nitroacetate | C3H5NO4 | 319 | 385 | 1.7 | atm | 1.81464 | 593.693 | -197.577 |
| 1-nitromethyl-1-cyclohexanol | C7H13NO3 | 343 | 404 | 1.7 | atm | 15.7061 | 6953.604 | -0.19179 |
| 3-nitro-2-butanone | C4H7NO3 | 329 | 365 | 1.7 | atm | 8.374270 | 3617.072 | -0.060774 |
| 3-nitrophenol | C6H5NO3 | 316 | 330 | 1.20 | atm | 5.039574 | 2613.383 | -62.1157 |
| 4-nitrophenol | C6H5NO3 | 328 | 353 | 4.1 | atm | 8.305 | 4180 | NA |
| 4-(1-methylpropyl)-2-nitrophenol | C10H13NO3 | 328 | 353 | 4.1 | atm | 7.59 | 3752 | NA |
| 5-methyl-2-nitrophenol | C7H7NO3 | 328 | 353 | 4.1 | atm | 6.412 | 3120 | NA |
| 4-methyl-2-nitrophenol | C7H7NO3 | 328 | 353 | 4.1 | atm | 6.392 | 3105 | NA |
| 3-methyl-2-nitrophenol | C7H7NO3 | 328 | 353 | 4.1 | atm | 6.315 | 3063 | NA |
| 2-nitrophenol | C6H5NO3 | 328 | 353 | 4.1 | atm | 5.735 | 2776 | NA |
| 5-methyl-2-nitrobenzoic acid | C8H7NO4 | 355 | 371 | 1.21 | atm | 4.17166 | 2616.891 | -81.851 |
| 2-methyl-6-nitrobenzoic acid | C8H7NO4 | 355 | 369 | 1.21 | atm | 7.518180 | 4286.549 | -15.02470 |
| 4-methyl-3-nitrobenzoic acid | C8H7NO4 | 315 | 377 | 1.21 | atm | 4.16965 | 2615.35 | -74.397 |
| 2-nitrobenzoic acid | C7H5NO4 | 346 | 366 | 1.22 | atm | 4.33022 | 2615.098 | -74.412 |
| 3-nitrobenzoic acid | C7H5NO4 | 347 | 361 | 1.22 | atm | 4.32231 | 2615.301 | -73.178 |
| 3-methyl-2-nitrobenzoic acid | C8H7NO4 | 371 | 385 | 1.21 | atm | 4.202501 | 2614.432 | -69.2644 |
| 3-methyl-4-nitrobenzoic acid | C8H7NO4 | 315 | 379 | 1.21 | atm | 4.239659 | 2614.377 | -67.9823 |
| 2-methyl-3-nitrobenzoic acid | C8H7NO4 | 357 | 371 | 1.21 | atm | 4.39919 | 2613.748 | -70.334 |
| 4-nitrobenzoic acid | C7H5NO4 | 367 | 381 | 1.22 | atm | 4.32001 | 2616.016 | -61.137 |
| 6-methyl-2,4-dinitrophenol | C7H6N2O5 | 328 | 353 | 4.1 | atm | 7.929 | 3970 | NA |
| 2,4-dinitrophenol | C6H4N2O5 | 328 | 353 | 4.1 | atm | 7.392 | 3680 | NA |
| 2,5-dinitrophenol | C6H4N2O5 | 328 | 353 | 4.1 | atm | 7.229 | 3580 | NA |
| 4-formyl-2-nitrophenol | C7H5NO4 | 328 | 353 | 4.1 | atm | 7.258 | 3540 | NA |
| 4-methoxy-2-nitrophenol | C7H7NO4 | 328 | 353 | 4.1 | atm | 5.518 | 2673 | NA |
| 3-methoxy-2-nitrobenzoic acid | C8H7NO5 | 398 | 410 | 1.22 | atm | 3.29532 | 2619.381 | -98.678 |
| 4-methoxy-3-nitrobenzoic acid | C8H7NO5 | 387 | 401 | 1.22 | atm | 3.48938 | 2616.311 | -92.307 |
| 3-methoxy-4-nitrobenzoic acid | C8H7NO5 | 388 | 402 | 1.22 | atm | 3.63341 | 2617.414 | -89.609 |
| aNA = Not Applicable |  |  |  |  |  |  |  |  |

| **Table 8.** Hydroperoxides, Peroxides, Hydroperoxy Acids, and Peroxycarbonyls in the SIMPOL.1 Basis and Test Sets and their Vapor Pressure Parameterizations. | | | | | | | | |
| --- | --- | --- | --- | --- | --- | --- | --- | --- |
| **Compound** | **Formula** | ***T*MIN (K)** | ***T*MAX (K)** | **Method/Source** | **Units for** | ***A*** | ***B*** | ***C*** |
| *di*-n-butyl-peroxide | C8H18O2 | 328 | 353 | 1.7 | atm | 1.77561 | 1139.512 | -0.019256 |
| *di*-(1-methyl-propyl)-peroxide | C8H18O2 | 316 | 332 | 1.7 | atm | 7.295134 | 2840.558 | -0.105291 |
| *di*-*tert*-butyl-peroxide | C8H18O2 | 253 | 373 | 4.2 | Torr | 7.14 | -1621 | NAa |
| diethyl-peroxide | C4H10O2 | 253 | 333 | 4.2 | Torr | 7.356 | -1517 | NA |
| 1-methyl-1-phenylethyl-hydroperoxide | C9H12O2 | 316 | 390 | 1.7 | atm | 4.06825 | 1032.085 | -201.3547 |
| *tert*-butyl-hydroperoxide | C4H10O2 | 273 | 393 | 4.2 | Torr | 8.891 | -2432 | NA |
| ethylhydroperoxide | C2H6O2 | 253 | 363 | 4.2 | Torr | 8.834 | -2228 | NA |
| methylhydroperoxide | CH4O2 | 253 | 313 | 4.2 | Torr | 8.38 | -1972 | NA |
| butyryl-hydroperoxide | C4H8O3 | 273 | 393 | 4.2 | Torr | 8.83 | -2376 | NA |
| propionylhydroperoxide | C3H6O3 | 273 | 393 | 4.2 | Torr | 8.623 | -2256 | NA |
| acetyl-hydroperoxide | C2H4O3 | 273 | 383 | 4.2 | Torr | 8.911 | -2311 | NA |
| peroxyacetylnitrate | C2H3O4N | 223 | 291 | 4.3 | Torr | 8.1474 | -1992.1 | NA |
| aNA = Not Applicable |  |  |  |  |  |  |  |  |
